# Supplementary material
Source: publisher figshare collection journal article supplement (https://diabetesjournals.figshare.com/ndownloader/files/36135212)
Supplement: Supplementary file 1 [file 36135212]

**Appendix Figure 1. CONSORT diagram**

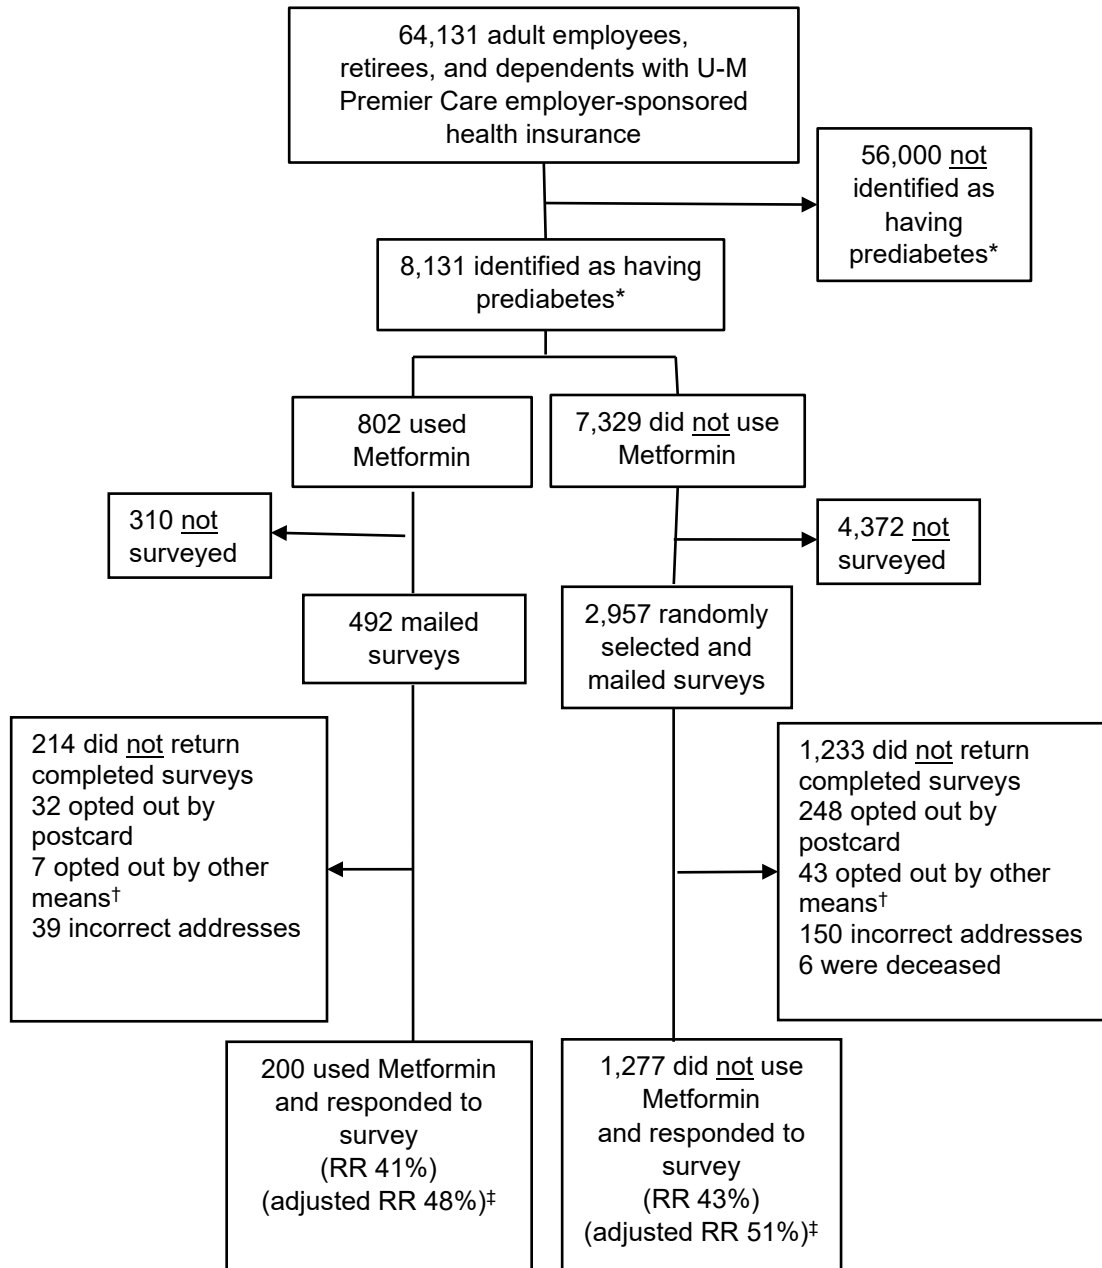

RR: Response Rate.

\*Prediabetes determined using insurance claim and laboratory data

†Opted-out by phone or email

‡Adjusted RR: Excludes individuals who opted out, for whom the address was incorrect, or who were deceased.
